# Supplementary material
Source: publisher figshare collection journal article supplement (https://gsajournals.figshare.com/ndownloader/files/22063038)
Supplement: Supplementary file 1 [file 22063038]

## Sheet: Sheet1
Supplemental Table 5. Comparison of small RNAs mapped to 5'TIRA and 3'TIRA of MuDR(p1) allowing two mismatches in different libraries
	mop1-1 immature eara														lbl1 leaf apexb
Small RNA	wild type							mop1-1 mutant							wild type							lbl1 mutant
length	5TIRA		3TIRA		Ratioc			5TIRA		3TIRA		Ratio			5TIRA		3TIRA		Ratio			5TIRA		3TIRA		Ratio
18-nt	0.17381		0		nd			1.12204		0		nd			1.12857		0.086813		13			1.13773		0		nd
19-nt	0.69524		0.34762		2			4.76865		0		nd			1.64945		0.086813		19			3.18566		0.227547		14
20-nt	0.69524		0.34762		2			44.4607		0		nd			2.25714		0.086813		26			3.64075		0		nd
21-nt	5.2143		0.34762		15			40.9543		1.68305		24.3333			7.46592		0.173626		43			9.32942		0		nd
22-nt	2.95477		0.86905		3.4			2.24407		2.10382		1.06667			4.08021		0.173626		23.5			3.8683		0.455094		8.5
23-nt	11.4715		3.4762		3.3			0.561018		0.420763		1.33333			9.54943		0.434065		22			16.3834		0		nd
24-nt	51.274		8.34288		6.14583			5.75043		1.5428		3.72727			83.6877		4.42746		18.902			115.366		4.09584		28.1667
25-nt	1.21667		0		nd			0.140254		0.280509		0.5			1.21538		0		nd			1.36528		0		nd
26-nt	0		0		nd			0.140254		0		nd			0		0		nd			0		0		nd
aThe data used here was derived from Nobuta et al., 2008.
bThe data used here was derived from Dotto et al., 2014, replicate 1.
cRatio of no. of small RNAs mapped to 5TIRA to no. of small RNAs mapped to 3TIRA; nd, not determined.
Comparison of small RNAs mapped to 5'TIRA and 3'TIRA of MuDR(p1) with zero mismatches in different libraries
	mop1-1 immature eara														lbl1 leaf apexb
Small RNA	wild type							mop1-1 mutant							wild type							lbl1 mutant
length	5TIRA		3TIRA		Ratioc			5TIRA		3TIRA		Ratio			5TIRA		3TIRA		Ratio			5TIRA		3TIRA		Ratio
18-nt	0		0		nd			0		0		nd			0.173626		0		nd			0		0		nd
19-nt	0		0		nd			0		0		nd			0.086813		0		nd			0.455094		0.227547		2
20-nt	0		0		nd			0.140254		0		nd			0.520878		0		nd			1.13773		0		nd
21-nt	0.52143		0		nd			1.82331		0.561018		3.25			0.520878		0		nd			1.13773		0		nd
22-nt	0		0		nd			0.981781		0.841527		1.16667			0.260439		0		nd			0		0		nd
23-nt	0.52143		0		nd			0.280509		0.140254		2			0.347252		0.086813		4			0.227547		0		nd
24-nt	3.30239		0		nd			2.66483		0.981781		2.71429			1.9967		0.954943		2.09091			2.27547		0.910187		2.5
25-nt	0		0		nd			0.140254		0.140254		1			0		0		nd			0		0		nd
26-nt	0		0		nd			0		0		nd			0		0		nd			0		0		nd
Comparison of small RNAs mapped to TIRA and TIRB of MuDR(p1) allowing two mismatches in different libraries
	mop1-1 immature eara														lbl1 leaf apexb
Small RNA	wild type							mop1-1 mutant							wild type							lbl1 mutant
length	TIRA		TIRB		Ratioc			TIRA		TIRB		Ratio			TIRA		TIRB		Ratio			TIRA		TIRB		Ratio
18-nt	0.17381		0.17381		1			1.12204		1.12204		1			0.954943		0.694504		1.375			1.13773		1.13773		1
19-nt	1.04286		1.21667		0.857143			4.76865		4.90891		0.971429			1.64945		1.64945		1			2.73056		2.73056		1
20-nt	0.69524		0.52143		1.33333			44.3204		44.4607		0.996845			1.73626		1.73626		1			2.50301		2.50301		1
21-nt	4.86668		3.65001		1.33333			39.2712		39.5518		0.992908			7.11866		6.51097		1.09333			8.19169		8.19169		1
22-nt	3.30239		2.60715		1.26667			1.26229		1.26229		1			3.81977		3.90658		0.977778			4.09584		4.09584		1
23-nt	11.2977		10.081		1.12069			0.420763		0.561018		0.75			9.28899		9.28899		1			16.1558		15.9283		1.01429
24-nt	49.1882		47.4501		1.03663			3.36611		3.0856		1.09091			82.2119		79.4339		1.03497			114.456		113.546		1.00802
25-nt	1.21667		0.52143		2.33333			0.140254		0.280509		0.5			1.21538		1.21538		1			1.36528		1.13773		1.2
26-nt	0		0		nd			0.140254		0.280509		0.5			0		0		nd			0		0		nd
Comparions of small RNAs mapped to TIRA and TIRB of MuDR(p1) with zero mismatches in different libraries
	mop1-1 immature eara														lbl1 leaf apexb
Small RNA	wild type							mop1-1 mutant							wild type							lbl1 mutant
length	TIRA		TIRB		Ratioc			TIRA		TIRB		Ratio			TIRA		TIRB		Ratio			TIRA		TIRB		Ratio
18-nt	0		0		nd			0		0		nd			0.173626		0.173626		1			0		0		nd
19-nt	0		0		nd			0		0		nd			0.086813		0.086813		1			0.455094		0.455094		1
20-nt	0		0		nd			0.140254		0.140254		1			0.520878		0.520878		1			1.13773		1.13773		1
21-nt	0.52143		0.52143		1			1.82331		1.96356		0.928571			0.520878		0.520878		1			1.13773		1.13773		1
22-nt	0		0		nd			1.12204		1.26229		0.888889			0.260439		0.260439		1			0		0		nd
23-nt	0.52143		0.52143		1			0.280509		0.140254		2			0.434065		0.347252		1.25			0.227547		0.227547		1
24-nt	3.30239		4.34525		0.76			2.94534		3.64662		0.807692			2.77802		2.08351		1.33333			2.95811		2.50301		1.18182
25-nt	0		0		nd			0.280509		0.140254		2			0		0		nd			0		0		nd
26-nt	0		0		nd			0		0		nd			0		0		nd			0		0		nd
